# Supplementary material
Source: PubMed Central journal article supplement (PMC117547)

### Long wavelength 366 nm series

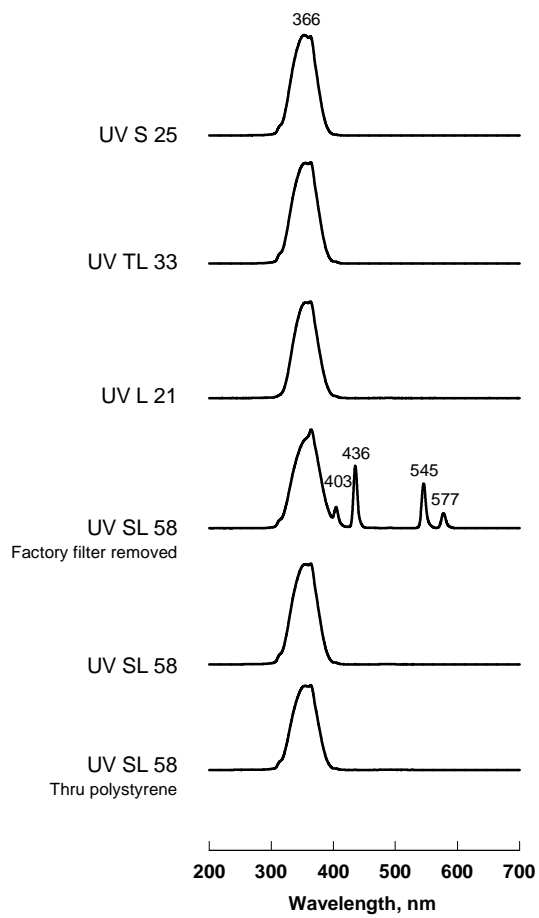

### Short wavelength 254 nm series

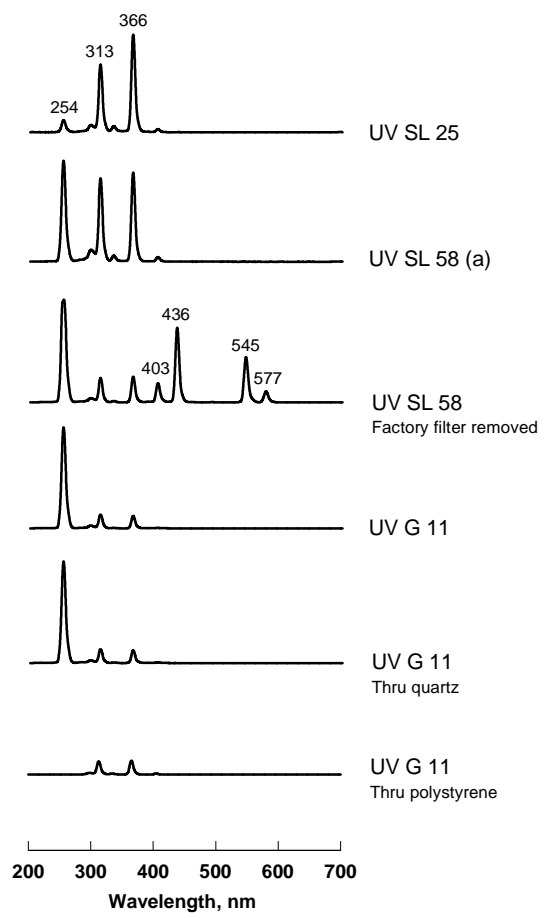

Supplement: pnas_99_1_251__5.pdf [file pnas_99_1_251__5.pdf]

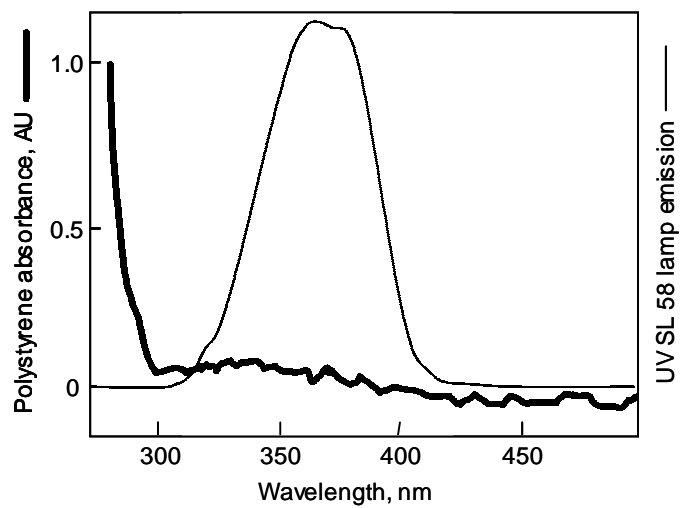

Supplement: pnas_99_1_251__6.pdf [file pnas_99_1_251__6.pdf]

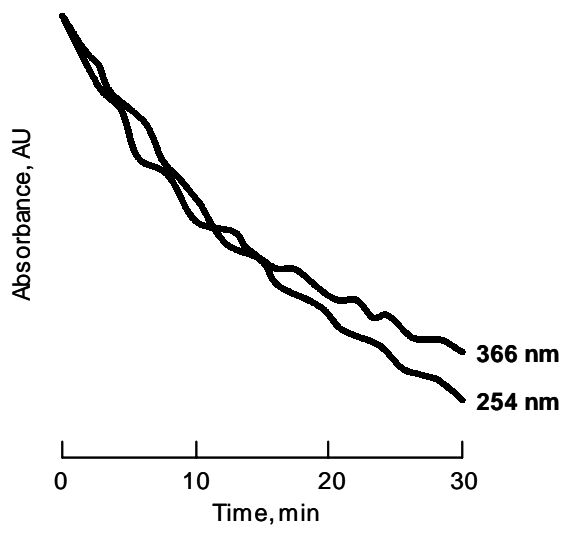

Supplement: pnas_99_1_251__7.pdf [file pnas_99_1_251__7.pdf]
